# Supplementary material for: Stereolithography 3D Printer for Micromodel Fabrications with Comprehensive Accuracy Evaluation by Using Microtomography
Source: MDPI journal article supplement (doi:10.3390/geosciences12050183), 2022-04-24
Supplement: s1 [file s1]

## Supplementary document S1

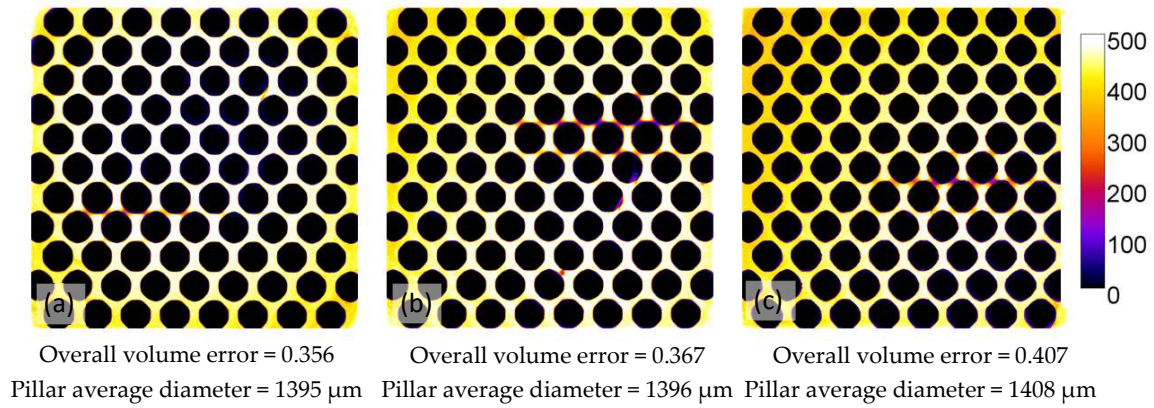

**Figure S1.** Depth map of uniform porous media with different prewashing time after printing of (a) 60 minutes, (b) 180 minutes, and (c) 360 minutes.

The effect of prewashing time after printing is shown in Supplementary Figure 1. With the increase in this period, the overall volume error increases. The pillar average diameter also increases, indicating the error increase from the intended diameter of 1200  $\mu\text{m}$ . In addition, throat blockages are also found in these results. These are significantly different when the sample was washed directed after the printing as shown in Figure 12b.

All of this printed sample were printed with thickness resolution of 50  $\mu\text{m}$  and uniform porous media design of GapX equals to  $D/2$ , GapY equals to  $D/8$ , and  $D$  equals to 1.2 mm, leading to GapR equals to 0.422 mm.
