# Supplementary material for: Stereolithography 3D Printer for Micromodel Fabrications with Comprehensive Accuracy Evaluation by Using Microtomography
Source: MDPI journal article supplement (doi:10.3390/geosciences12050183), 2022-04-24
Supplement: s1 [file s1]

## Supplementary document S2

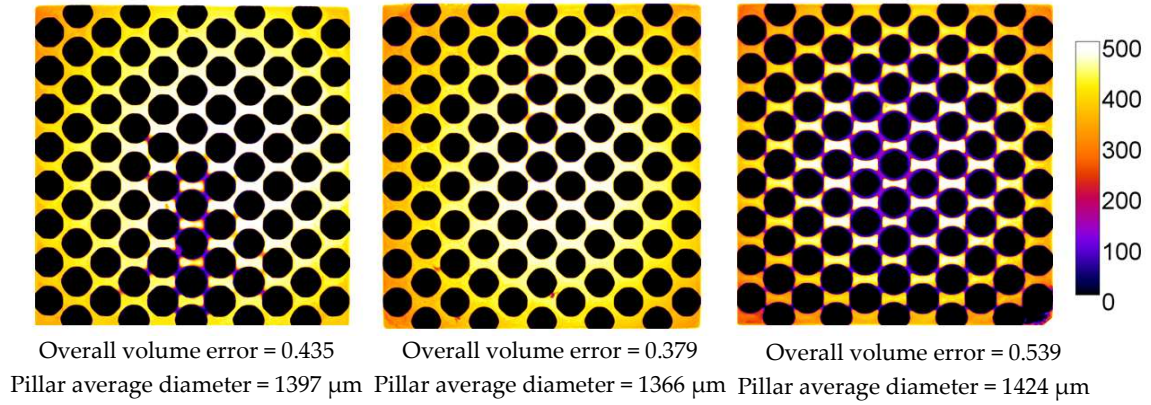

**Figure S2.** Depth map of uniform porous media printed with thickness resolution of (a) 25  $\mu\text{m}$ , (b) 50  $\mu\text{m}$ , and (c) 100  $\mu\text{m}$  after rapid curing in curing chamber.

The effect of rapid curing in curing chamber is shown in Supplementary Figure 2. The overall volume error and pillar average diameter are larger than the results with natural curing by leaving the sample open at the room condition in Figure 12. The color gradation in these results are also more significant than in Figure 12, demonstrating the severe bending effect due to the rapid curing in curing chamber.

All of this printed sample used uniform porous media design of GapX equals to  $D/2$ , GapY equals to  $D/8$ , and D equals to 1.2 mm, leading to GapR equals to 0.422 mm.
