# Supplementary material for: Stereolithography 3D Printer for Micromodel Fabrications with Comprehensive Accuracy Evaluation by Using Microtomography
Source: MDPI journal article supplement (doi:10.3390/geosciences12050183), 2022-04-24
Supplement: s1 [file s1]

Archive with 4 entries (4 files):
- Animation S3.gif
- Animation S4.gif
- Document S1.pdf
- Document S2.pdf
