# Supplementary figures and images for: Stereolithography 3D Printer for Micromodel Fabrications with Comprehensive Accuracy Evaluation by Using Microtomography
Source: MDPI journal article supplement (doi:10.3390/geosciences12050183), 2022-04-24

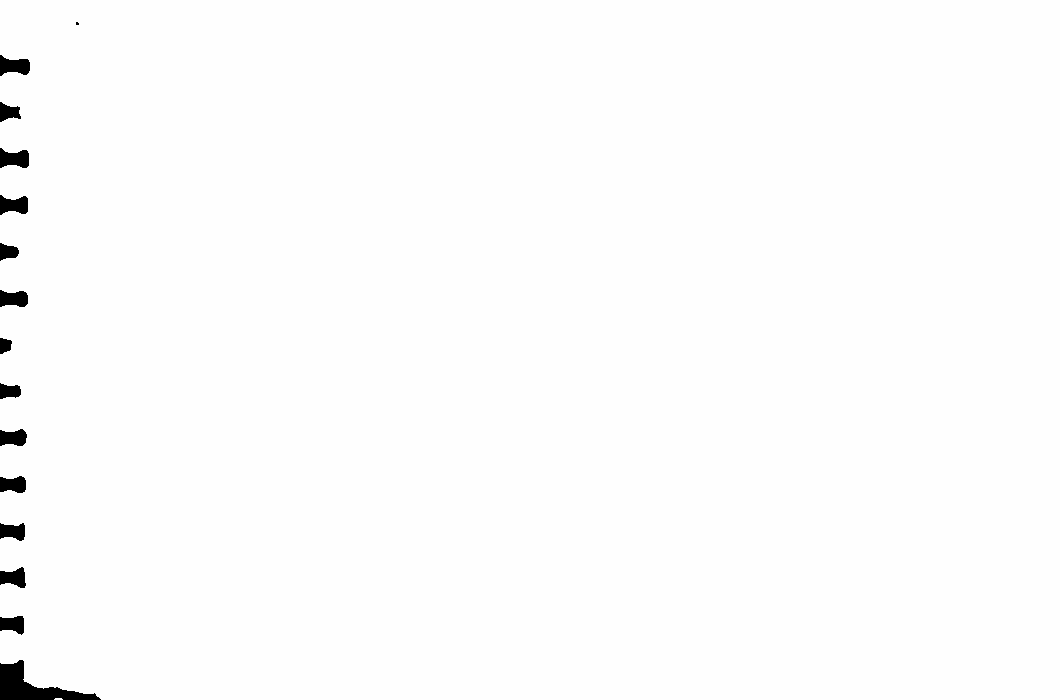

Supplement: s1 [file s1 › Animation S3.gif]

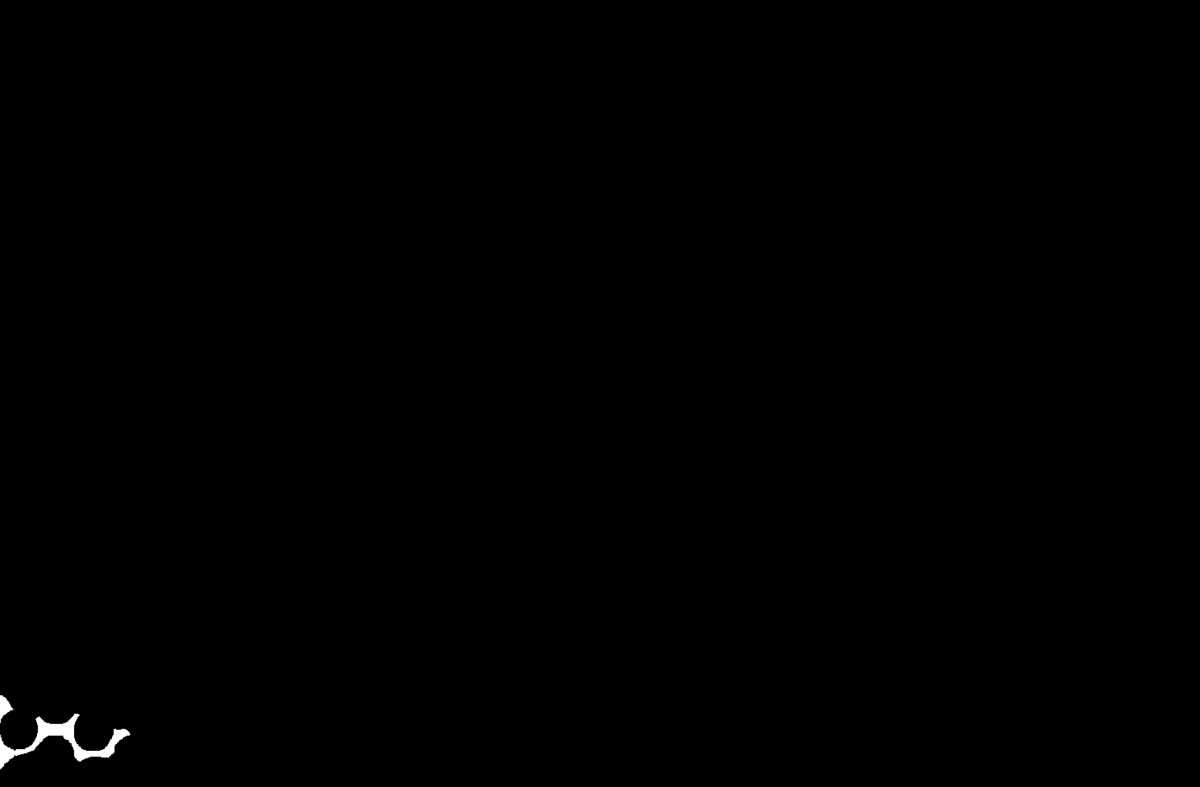

Supplement: s1 [file s1 › Animation S4.gif]
